# Supplementary material for: Structural basis for histone variant H3tK27me3 recognition by PHF1 and PHF19
Source: eLife. 2020 Sep 1;9:e58675. doi: 10.7554/eLife.58675 (PMC7492083; doi:10.7554/eLife.58675)
Supplement: Supplementary file 1. [file elife-58675-supp1.xlsx]

## Sheet: Input
Summary of H3/H3t peptides containing K27, detected in the input fraction
SN190012_LysN_Input													K27	K36
Peptide #	Query	Start	–	End	Observed	Mr(expt)	Mr(calc)	ppm	Score	Expect		Peptide
1	253	27	–	35	394.218	786.422	786.424	-1.96	15	0.2		R.KSAPATGGV.K
2	254	27	–	35	394.218	786.422	786.424	-1.96	23	0.059		R.KSAPATGGV.K
3	255	27	–	35	394.218	786.422	786.424	-1.88	22	0.052		R.KSAPATGGV.K
4	256	27	–	35	394.219	786.422	786.424	-1.43	28	0.023		R.KSAPATGGV.K
5	257	27	–	35	394.219	786.422	786.424	-1.43	24	0.026		R.KSAPATGGV.K
6	258	27	–	35	394.219	786.423	786.424	-1.25	10	0.96		R.KSAPATGGV.K
7	259	27	–	35	394.219	786.423	786.424	-1.25	21	0.028		R.KSAPATGGV.K
8	260	27	–	35	394.219	786.423	786.424	-1.25	26	0.023		R.KSAPATGGV.K
9	261	27	–	35	394.219	786.423	786.424	-1.17	22	0.11		R.KSAPATGGV.K
10	263	27	–	35	394.219	786.423	786.424	-1.09	19	0.026		R.KSAPATGGV.K
11	264	27	–	35	394.219	786.423	786.424	-1.09	28	0.022		R.KSAPATGGV.K
12	265	27	–	35	394.219	786.423	786.424	-0.87	25	0.038		R.KSAPATGGV.K
13	266	27	–	35	394.219	786.423	786.424	-0.79	27	0.011		R.KSAPATGGV.K
14	267	27	–	35	394.219	786.423	786.424	-0.71	28	0.026		R.KSAPATGGV.K
15	268	27	–	35	394.219	786.423	786.424	-0.71	28	0.025		R.KSAPATGGV.K
16	270	27	–	35	394.219	786.423	786.424	-0.64	20	0.054		R.KSAPATGGV.K
17	271	27	–	35	394.219	786.423	786.424	-0.64	27	0.023		R.KSAPATGGV.K
18	272	27	–	35	394.219	786.423	786.424	-0.48	29	0.019		R.KSAPATGGV.K
19	273	27	–	35	394.219	786.423	786.424	-0.48	23	0.04		R.KSAPATGGV.K
20	274	27	–	35	394.219	786.423	786.424	-0.48	12	0.51		R.KSAPATGGV.K
21	276	27	–	35	394.219	786.423	786.424	-0.41	10	0.23		R.KSAPATGGV.K
22	277	27	–	35	394.219	786.423	786.424	-0.41	20	0.14		R.KSAPATGGV.K
23	278	27	–	35	394.219	786.423	786.424	-0.18	19	0.077		R.KSAPATGGV.K
24	279	27	–	35	394.219	786.423	786.424	-0.027	32	0.011		R.KSAPATGGV.K
25	280	27	–	35	394.219	786.424	786.424	0.05	31	0.018		R.KSAPATGGV.K
26	284	27	–	35	394.219	786.424	786.424	0.84	23	0.026		R.KSAPATGGV.K
27	286	27	–	35	394.22	786.425	786.424	2.01	58	3.2e-05		R.KSAPATGGV.K
28	287	27	–	35	394.22	786.425	786.424	2.08	18	0.11		R.KSAPATGGV.K
29	340	27	–	35	401.226	800.438	800.439	-0.89	15	0.56		R.KSAPATGGV.K + Methyl (K)	me1
30	847	27	–	36	458.265	914.516	914.519	-2.31	10	0.77		R.KSAPATGGVK.K
31	848	27	–	36	458.265	914.516	914.519	-2.25	13	0.73		R.KSAPATGGVK.K
32	850	27	–	36	458.266	914.517	914.519	-1.66	29	0.048		R.KSAPATGGVK.K
33	851	27	–	36	458.266	914.518	914.519	-1.05	19	0.21		R.KSAPATGGVK.K
34	853	27	–	36	458.266	914.518	914.519	-0.65	14	0.35		R.KSAPATGGVK.K
35	854	27	–	36	458.266	914.518	914.519	-0.32	20	0.24		R.KSAPATGGVK.K
36	857	27	–	36	458.267	914.519	914.519	0.35	13	0.84		R.KSAPATGGVK.K
37	859	27	–	36	458.267	914.519	914.519	0.68	13	0.36		R.KSAPATGGVK.K
38	860	27	–	36	458.267	914.519	914.519	0.94	17	0.41		R.KSAPATGGVK.K
39	914	27	–	36	465.272	928.53	928.534	-4.11	10	0.76		R.KSAPATGGVK.K + Methyl (K)	me1
40	917	27	–	36	465.274	928.532	928.534	-1.93	12	0.38		R.KSAPATGGVK.K + Methyl (K)	me1
41	919	27	–	36	465.274	928.533	928.534	-1.41	12	0.52		R.KSAPATGGVK.K + Methyl (K)	me1
42	924	27	–	36	465.274	928.533	928.534	-1	37	0.032		R.KSAPATGGVK.K + Methyl (K)	me1
43	925	27	–	36	465.274	928.533	928.534	-0.94	16	0.38		R.KSAPATGGVK.K + Methyl (K)	me1
44	1029	27	–	36	472.281	942.548	942.55	-1.35	26	0.69		R.KSAPATGGVK.K + Dimethyl (K)	me2
45	1089	27	–	36	479.289	956.564	956.566	-1.18	22	0.068		R.KSAPATGGVK.K + Trimethyl (K)		me3
46	1239	27	–	36	486.298	970.581	970.581	-0.37	19	0.39		R.KSAPATGGVK.K + Methyl (K); Trimethyl (K)	me1	me3
47	1241	27	–	36	486.298	970.581	970.581	0.079	45	0.0071		R.KSAPATGGVK.K + Methyl (K); Trimethyl (K)	me1	me3
48	1349	27	–	36	493.305	984.596	984.597	-0.82	39	0.0054		R.KSAPATGGVK.K + Dimethyl (K); Trimethyl (K)	me2	me3
49	1687	27	–	36	515.288	1028.56	1028.56	-0.7	24	0.47		R.KSAPATGGVK.K + GG (K)		Ub
* Peptides with Score ≥10 and Expect < 1 were extracted.

## Sheet: Pull-down
Summary of H3/H3t peptides containing K27, detected in the pull-down fraction
SN190014_LysN													K23	K27	K36
Peptide #	Query	Start	–	End	Observed	Mr(expt)	Mr(calc)	ppm	Score	Expect		Peptide
1	313	27	–	35	394.219	786.423	786.424	-1.32	12	0.21		R.KSAPATGGV.K
2	315	27	–	35	394.219	786.423	786.424	-0.76	12	0.3		R.KSAPATGGV.K
3	316	27	–	35	394.219	786.423	786.424	-0.61	16	0.44		R.KSAPATGGV.K
4	319	27	–	35	394.219	786.424	786.424	1.17	30	0.0092		R.KSAPATGGV.K
5	898	27	–	36	458.267	914.519	914.519	0.7	19	0.47		R.KSAPATGGVK.K
6	899	27	–	36	458.267	914.52	914.519	1.25	25	0.73		R.KSAPATGGVK.K
7	903	27	–	36	458.268	914.522	914.519	3.46	10	0.6		R.KSAPATGGVK.K
8	940	27	–	36	465.274	928.534	928.534	0.2	45	0.007		R.KSAPATGGVK.K + Methyl (K)		me1
9	1025	27	–	36	472.282	942.549	942.55	-1.03	28	0.41		R.KSAPATGGVK.K + Dimethyl (K)		me2
10	1026	27	–	36	472.282	942.55	942.55	0.25	16	0.67		R.KSAPATGGVK.K + 2 Methyl (K)		me1	me1
11	1089	27	–	36	479.29	956.566	956.566	0.16	22	0.15		R.KSAPATGGVK.K + Methyl (K); Dimethyl (K)		me1	me2
12	1090	27	–	36	479.29	956.566	956.566	0.29	27	0.096		R.KSAPATGGVK.K + Trimethyl (K)			me3
13	1204	27	–	36	486.298	970.581	970.581	-0.37	55	0.00083		R.KSAPATGGVK.K + Methyl (K); Trimethyl (K)		me1	me3
14	1307	27	–	36	493.306	984.597	984.597	-0.12	35	0.0072		R.KSAPATGGVK.K + Dimethyl (K); Trimethyl (K)		me2	me3
15	6945	18	–	35	609.027	1824.06	1824.06	0.43	14	0.3		R.KQLATKAARKSAPATGGV.K + Acetyl (K); Dimethyl (K)		me2
16	6946	18	–	35	913.037	1824.06	1824.06	1.17	56	0.0017		R.KQLATKAARKSAPATGGV.K + Acetyl (K); Dimethyl (K)		me2
17	7021	18	–	35	920.043	1838.07	1838.07	-1.11	11	0.98		R.KQLATKAARKSAPATGGV.K + Acetyl (K); Trimethyl (K)		me3
18	8023	18	–	36	984.091	1966.17	1966.17	-0.65	25	0.25		R.KQLATKAARKSAPATGGVK.K + Acetyl (K); Trimethyl (K)		me3
19	8196	18	–	36	991.098	1980.18	1980.18	-1.51	57	0.0012		R.KQLATKAARKSAPATGGVK.K + Acetyl (K); 2 Dimethyl (K)		me2	me2
20	8197	18	–	36	991.098	1980.18	1980.18	-1.51	73	3e-05		R.KQLATKAARKSAPATGGVK.K + Acetyl (K); 2 Dimethyl (K)		me2	me2
21	8198	18	–	36	661.069	1980.19	1980.18	0.73	16	0.97		R.KQLATKAARKSAPATGGVK.K + Acetyl (K); Methyl (K); Trimethyl (K)		me3	me1
22	3886	23	–	36	692.425	1382.84	1382.84	-0.062	42	0.022		T.KAARKSAPATGGVK.K + Trimethyl (K)		me3
23	3887	23	–	36	461.953	1382.84	1382.84	0.22	24	0.36		T.KAARKSAPATGGVK.K + Methyl (K); Dimethyl (K)	me2	me1
24	3990	23	–	36	699.434	1396.85	1396.85	0.87	30	0.45		T.KAARKSAPATGGVK.K + 2 Methyl (K); Dimethyl (K)	me1	me2	me1
25	4093	23	–	36	706.441	1410.87	1410.87	0.69	14	0.55		T.KAARKSAPATGGVK.K + Dimethyl (K); Trimethyl (K)		me3	me2
26	17640	23	–	55	944.546	3774.16	3774.19	-8.29	16	0.85		T.KAARKSAPATGGVKKPHRYRPGTVALREIRRYQ.K + Methyl (K); Trimethyl (K)		me3	me1
* Peptides with Score ≥10 and Expect < 1 were extracted.
** Peptide #15-26 contain 24A, indicating that these paptides were derived from canonical H3.
